# Supplementary material for: Forest Degradation in the Southwest Brazilian Amazon: Impact on Tree Species of Economic Interest and Traditional Use
Source: MDPI journal article supplement (doi:10.3390/fire6060234), 2023-06-13
Supplement: s1 [file s1]

## SUPPLEMENTARY MATERIAL

### Forest degradation in the southwest Brazilian Amazon: impact on tree species of economic interest and traditional use

Jessica Gomes Costa<sup>1\*</sup>, Philip Martin Fearnside<sup>2</sup>, Igor Oliveira<sup>1</sup>, Liana Oighenstein Anderson<sup>3</sup>, Luiz Eduardo Oliveira e Cruz de Aragão<sup>4</sup>, Marllus Rafael Negreiros Almeida<sup>1</sup>, Francisco Salatiel Clemente<sup>1</sup>, Eric de Souza Nascimento<sup>1</sup>, Geane da Conceição Souza<sup>1</sup>, Adriele Karlokoski<sup>5</sup>, Antonio Willian Flores de Melo<sup>1</sup>, Edson Alves de Araújo<sup>1</sup>, Rogério Oliveira Souza<sup>1</sup>, Paulo Mauricio Lima de Alencastro Graça<sup>2</sup>, Sonaira Souza da Silva<sup>1</sup>

- <sup>1</sup> Universidade Federal do Acre, Campus Floresta. Estrada Canela Fina, km 12, CEP 69980-000, Cruzeiro do Sul, Acre, Brazil; gomes.jessica@sou.ufac.br (JGC); igor.oliveira@ufac.br (IO); rafaelbio2011@gmail.com (MRNA); salatielclemente@gmail.com (FSC); eric.nascimento@sou.ufac.br (ESN); souzageanebio@gmail.com (GS); willian.flores@ufac.br (AWFM); edson.araujo@ufac.br (EAA); rogerio.souza@ufac.br (ROS); sonaira.silva@ufac.br (SSS);
- <sup>2</sup> Instituto Nacional de Pesquisas da Amazônia, Av. André Araújo, 2936, CEP 69067-375, Manaus, Amazonas, Brazil; pmlag@inpa.gov.br (PMLAG); pmfearn@inpa.gov.br (PMF);
- <sup>3</sup> Centro Nacional de Monitoramento e Alertas de Desastres Naturais, São José dos Campos, São Paulo, Brazil; liana.anderson@cemaden.gov.br (LOA);
- <sup>4</sup> Instituto Nacional Brasileiro de Pesquisa Espacial, São José dos Campos, São Paulo, Brazil; lu-iz.aragao@inpe.br (LEOCA)
- <sup>5</sup> Instituto Tocantinense Presidente Antônio Carlos, Av. 25 de Agosto, CEP 69980-000, Cruzeiro do Sul, AC- Brazil; adriele.oliveira@cruzeirodosul.itpac.br (AK)

\*Corresponding Author: [gomes.jessica@sou.ufac.br](mailto:gomes.jessica@sou.ufac.br)

Postal address: UFAC, CEP 69.980-000, Cruzeiro do Sul, Acre, Brazil

Table S1. List of species with timber (TP), non-timber potential (NTP) and multiple-use (MU) potential.

Table S2. List of pioneer species with potential use according to the literature review.

Table S3. Parameters and statistics of the GLMM equations adjusted for the dependent variables as a function of the independent fixed and random effect variables. The parameters refer to the equations:  $[\log(TP) = a + b(TAF) + c(FR) + d(FR \times TAF) + \varepsilon]$  for the dependent variable density of species with timber potential (TP) ;  $[\log(NTP | MUP) = a + b(FR) + \varepsilon]$  for the dependent variables density of non-timber species (NTP) and density of multiple-use species (MUP). The fixed-effect independent variables are time after first fire event (TAF) and fire recurrence (FR). The independent variable of random effect are composed by the vegetation types (VT), FC = Forested campinarana, TC = Treed campinarana, OFDB = Open forest with dominant bamboo, OFBP = Open forest with bamboo and palms, OFP = Open forest with palms. Values in parentheses indicate 95% confidence intervals.

Table S1. List of species with timber (TP), non-timber potential (NTP) and Multiple-use potential (MUP) potential.

| Species                                                     | Family        | TP | NTP | MUP | References     |
|-------------------------------------------------------------|---------------|----|-----|-----|----------------|
| <i>Abarema jupunba</i> (Willd.) Britton & Killip            | Fabaceae      | x  |     |     | [1]            |
| <i>Agonandra brasiliensis</i> Miers ex Benth. & Hook.f.     | Opiliaceae    | x  |     |     | [2];[3];[4]    |
| <i>Albizia niopoides</i> (Spruce ex Benth.) Burkart         | Fabaceae      | x  |     |     | [5]            |
| <i>Allantoma lineata</i> (Mart. ex O. Berg) Miers           | Lecythidaceae | x  |     |     | [1];[6]        |
| <i>Amburana acreana</i> (Ducke) A.C.Sm.                     | Fabaceae      |    |     | x   | [6];[8];[9]    |
| <i>Anacardium spruceanum</i> Benth. ex Engl.                | Anacardiaceae | x  |     |     | [6];[10]       |
| <i>Andira inermis</i> (W. Wright) DC.                       | Fabaceae      | x  |     |     | [11];[12];[13] |
| <i>Antrocaryon amazonicum</i> (Ducke) B.L. Burt & A.W. Hill | Anacardiaceae |    | x   |     | [14];[15]      |
| <i>Apeiba membranacea</i> Spruce ex Benth.                  | Malvaceae     | x  |     |     | [16];[17]      |
| <i>Apuleia leiocarpa</i> (Vogel) J.F. Macbr.                | Fabaceae      | x  |     |     | [6];[7];[18]   |
| <i>Aspidosperma desmanthum</i> Benth. ex Müll.Arg.          | Apocynaceae   | x  |     |     | [6]; [11];[19] |
| <i>Aspidosperma macrocarpon</i> Mart. & Zucc.               | Apocynaceae   | x  |     |     | [6];[20]       |
| <i>Aspidosperma nitidum</i> Benth. ex Müll.Arg.             | Apocynaceae   |    | x   |     | [21];[22];[23] |
| <i>Aspidosperma Vargasii</i> A.DC.                          | Apocynaceae   | x  |     |     | [18];[24]      |
| <i>Astrocaryum aculeatum</i> G. Mey.                        | Arecaceae     |    | x   |     | [25];[26];[27] |
| <i>Astrocaryum murumuru</i> Mart.                           | Arecaceae     |    | x   |     | [28];[29];[30] |
| <i>Astronium lecointei</i> Ducke                            | Anacardiaceae | x  |     |     | [3];[6];[24]   |
| <i>Attalea butyracea</i> (Mutis ex L.f.) Wess.Boer          | Arecaceae     |    | x   |     | [28];[31];[32] |
| <i>Attalea phalerata</i> Mart. ex Spreng.                   | Arecaceae     |    | x   |     | [26]           |
| <i>Bactris gasipaes</i> Kunth                               | Arecaceae     |    | x   |     | [26];[28];[34] |
| <i>Batocarpus amazonicus</i> (Ducke) Fosberg                | Moraceae      | x  |     |     | [24];[35]      |
| <i>Bertholletia excelsa</i> Bonpl.                          | Lecythidaceae |    |     | x   | [6];[36];[37]  |
| <i>Bixa arborea</i> Huber                                   | Bixaceae      | x  |     |     | [6];[38]       |

|                                                            |               |   |                |
|------------------------------------------------------------|---------------|---|----------------|
| <i>Bowdichia nitida</i> Spruce ex Benth.                   | Fabaceae      | x | [6];[39]       |
| <i>Brosimum acutifolium</i> Huber                          | Moraceae      | x | [6];[19]       |
| <i>Brosimum guianense</i> (Aubl.) Huber                    | Moraceae      | x | [19];[40]      |
| <i>Brosimum lactescens</i> (S. Moore) C.C. Berg            | Moraceae      | x | [41];[42]      |
| <i>Brosimum rubescens</i> Taub.                            | Moraceae      | x | [6];[19]       |
| <i>Calophyllum brasiliense</i> Cambess.                    | Clusiaceae    | x | [6];[11];[43]  |
| <i>Calycophyllum megistocaulum</i> (K. Krause) C.M. Taylor | Rubiaceae     | x | [44]           |
| <i>Calycophyllum spruceanum</i> (Benth.) K. Schum.         | Rubiaceae     | x | [45];[46]      |
| <i>Cariniana estrellensis</i> (Raddi) Kuntze               | Lecythidaceae | x | [45];[47];[48] |
| <i>Caryocar brasiliense</i> Cambess.                       | Caryocaraceae | x | [49]           |
| <i>Caryocar glabrum</i> (Aubl.) Pers.                      | Caryocaraceae | x | [3];[6];[11]   |
| <i>Caryocar villosum</i> (Aubl.) Pers.                     | Caryocaraceae | x | [6];[7];[45]   |
| <i>Castilla ulei</i> Warb.                                 | Moraceae      | x | [50]           |
| <i>Cedrela fissilis</i> Vell.                              | Meliaceae     | x | [6];[51]       |
| <i>Cedrela odorata</i> L.                                  | Meliaceae     | x | [52];[53]      |
| <i>Ceiba pentandra</i> (L.) Gaertn.                        | Malvaceae     | x | [6];[45]       |
| <i>Clarisia racemosa</i> Ruiz & Pav.                       | Moraceae      | x | [6];[35]       |
| <i>Colubrina glandulosa</i> Perkins                        | Rhamnaceae    | x | [54];[55]      |
| <i>Copaifera multijuga</i> Hayne                           | Fabaceae      | x | [6];[50]       |
| <i>Cordia goeldiana</i> Huber                              | Boraginaceae  | x | [19];[45];[56] |
| <i>Cordia nodosa</i> Lam.                                  | Boraginaceae  | x | [57]           |
| <i>Couratari guianensis</i> Aubl.                          | Lecythidaceae | x | [3];[6];[7]    |
| <i>Couratari longipedicellata</i> W.A. Rodrigues           | Lecythidaceae | x | [58];[59]      |
| <i>Couroupita guianensis</i> Aubl.                         | Lecythidaceae | x | [60];[61]      |
| <i>Dalbergia brasiliensis</i> Vogel                        | Fabaceae      | x | [54]           |
| <i>Diclinanona calycina</i> (Diels) R.E.Fr.                | Annonaceae    | x | [11]           |
| <i>Didymopanax morototoni</i> (Aubl.) Decne. & Planch.     | Araliaceae    | x | [45];[62]      |

|                                                          |                |   |                |
|----------------------------------------------------------|----------------|---|----------------|
| <i>Dipteryx odorata</i> (Aubl.) Forsyth f.               | Fabaceae       | x | [6];[52];[63]  |
| <i>Drypetes variabilis</i> Uittien                       | Putranjivaceae | x | [3];[11]       |
| <i>Eriotheca globosa</i> (Aubl.) A. Robyns               | Malvaceae      | x | [24];[35]      |
| <i>Eriotheca longipedicellata</i> (Ducke) A. Robyns      | Malvaceae      | x | [6]            |
| <i>Erismia uncinatum</i> Warm.                           | Vochysiaceae   | x | [3];[6];[7]    |
| <i>Erythrina verna</i> Vell.                             | Fabaceae       | x | [4];[42]       |
| <i>Eschweilera coriacea</i> (DC.) S.A. Mori              | Lecythidaceae  | x | [6];[64]       |
| <i>Euterpe precatoria</i> Mart.                          | Arecaceae      | x | [28]           |
| <i>Gallesia integrifolia</i> (Spreng.) Harms             | Phytolaccaceae | x | [6];[65]       |
| <i>Genipa americana</i> L.                               | Rubiaceae      | x | [54];[66]      |
| <i>Guazuma ulmifolia</i> Lam.                            | Malvaceae      | x | [50];[67];[68] |
| <i>Handroanthus impetiginosus</i> (Mart. ex DC.) Mattos  | Bignoniaceae   | x | [6];[51]       |
| <i>Handroanthus ochraceus</i> (Cham.) Mattos             | Bignoniaceae   | x | [6];[69]       |
| <i>Handroanthus serratifolius</i> (Vahl) S. Grose        | Bignoniaceae   | x | [6];[20]       |
| <i>Hevea brasiliensis</i> (Willd. ex A. Juss.) Müll.Arg. | Euphorbiaceae  | x | [6];[70]       |
| <i>Himatanthus articulatus</i> (Vahl) Woodson            | Apocynaceae    | x | [71];[72]      |
| <i>Hura crepitans</i> L.                                 | Euphorbiaceae  | x | [6];[73]       |
| <i>Hymenaea courbaril</i> L.                             | Fabaceae       | x | [6];[20]       |
| <i>Hymenaea oblongifolia</i> Huber                       | Fabaceae       | x | [6];[18]       |
| <i>Hymenolobium pulcherrimum</i> Ducke.                  | Fabaceae       | x | [6];[11]       |
| <i>Inga alba</i> (Sw.) Willd.                            | Fabaceae       | x | [74]           |
| <i>Inga capitata</i> Desv.                               | Fabaceae       | x | [75];[76]      |
| <i>Inga edulis</i> Mart.                                 | Fabaceae       | x | [74];[75]      |
| <i>Iriarteia deltoidea</i> Ruiz & Pav.                   | Arecaceae      | x | [26];[28]      |
| <i>Iryanthera juruensis</i> Warb.                        | Myristicaceae  | x | [77]           |
| <i>Jacaranda copaia</i> (Aubl.) D.Don                    | Bignoniaceae   | x | [78];[79]      |
| <i>Laetia procera</i> (Poepp.) Eichler                   | Salicaceae     | x | [6];[19]       |
| <i>Manilkara bidentata</i> (A.DC.) A. Chev.              | Sapotaceae     | x | [6];[11]       |

|                                                          |               |   |                |
|----------------------------------------------------------|---------------|---|----------------|
| <i>Maquira sclerophylla</i> (Ducke) C.C. Berg            | Moraceae      | x | [3];[6]        |
| <i>Martiodendron elatum</i> (Ducke) Gleason              | Fabaceae      | x | [6];[19]       |
| <i>Matisia cordata</i> Humb. & Bonpl.                    | Malvaceae     | x | [77];[80]      |
| <i>Mauritia flexuosa</i> L.f.                            | Arecaceae     | x | [28];[81];[82] |
| <i>Mezilaurus itauba</i> (Meisn.) Taub. ex Mez           | Lauraceae     | x | [6];[19];[83]  |
| <i>Micropholis venulosa</i> (Mart. & Eichler) Pierre     | Sapotaceae    | x | [56]           |
| <i>Myroxylon balsamum</i> (L.) Harms                     | Fabaceae      | x | [18];[19]      |
| <i>Ochroma pyramidale</i> (Cav. ex Lam.) Urb.            | Malvaceae     | x | [45];[84]      |
| <i>Ocotea aciphylla</i> (Nees & Mart.) Mez               | Lauraceae     | x | [64];[85]      |
| <i>Ocotea nigrescens</i> Vicent.                         | Lauraceae     | x | [19]           |
| <i>Oenocarpus bataua</i> Mart.                           | Arecaceae     | x | [28];[81]      |
| <i>Oenocarpus minor</i> Mart.                            | Arecaceae     | x | [86];[87]      |
| <i>Ormosia grossa</i> Rudd                               | Fabaceae      | x | [88]           |
| <i>Osteophloeum platyspermum</i> (Spruce ex A.DC.) Warb. | Myristicaceae | x | [11];[85]      |
| <i>Parkia multijuga</i> Benth.                           | Fabaceae      | x | [6];[89]       |
| <i>Parkia nitida</i> Miq.                                | Fabaceae      | x | [11];[20]      |
| <i>Parkia pendula</i> (Willd.) Benth. ex Walp.           | Fabaceae      | x | [6];[89]       |
| <i>Platonia insignis</i> Mart.                           | Clusiaceae    | x | [74];[90]      |
| <i>Platymiscium trinitatis</i> Benth.                    | Fabaceae      | x | [6];[91]       |
| <i>Pouteria caimito</i> (Ruiz & Pav.) Radlk.             | Sapotaceae    | x | [19];[51]      |
| <i>Pouteria reticulata</i> (Engl.) Eyma                  | Sapotaceae    | x | [3]            |
| <i>Protium amazonicum</i> (Cuatrec.) Daly                | Burseraceae   | x | [92]           |
| <i>Protium apiculatum</i> Swart                          | Burseraceae   | x | [11];[19]      |
| <i>Protium heptaphyllum</i> (Aubl.) Marchand             | Burseraceae   | x | [6];[19]       |
| <i>Pterocarpus rohrii</i> Vahl                           | Fabaceae      | x | [5];[6]        |
| <i>Qualea tessmannii</i> Mildbr.                         | Vochysiaceae  | x | [93]           |
| <i>Roupala montana</i> Aubl.                             | Proteaceae    | x | [6];[93]       |
| <i>Schizolobium amazonicum</i> Huber ex Ducke            | Fabaceae      | x | [9];[20];[35]  |

|                                                     |               |   |                  |
|-----------------------------------------------------|---------------|---|------------------|
| <i>Sextonia rubra</i> (Mez) van der Werff           | Lauraceae     | x | [19];[94]        |
| <i>Simarouba amara</i> Aubl.                        | Simaroubaceae | x | [6];[45]         |
| <i>Socratea exorrhiza</i> (Mart.) H. Wendl.         | Arecaceae     | x | [26];[28]        |
| <i>Spondias mombin</i> L.                           | Anacardiaceae | x | [95];[96]        |
| <i>Spondias testudinis</i> J.D. Mitch. & Daly       | Anacardiaceae | x | [14]             |
| <i>Sterculia excelsa</i> Mart.                      | Malvaceae     | x | [6];[19]         |
| <i>Stryphnodendron pulcherrimum</i> (Willd.) Hochr. | Fabaceae      | x | [97];[98]        |
| <i>Swietenia macrophylla</i> King                   | Meliaceae     | x | [6];[99]         |
| <i>Symphonia globulifera</i> L.f.                   | Clusiaceae    | x | [6];[100]        |
| <i>Tapirira guianensis</i> Aubl.                    | Anacardiaceae | x | [6];[9];[101]    |
| <i>Terminalia amazonia</i> (J.F. Gmel.) Exell       | Combretaceae  | x | [6];[102]        |
| <i>Theobroma cacao</i> L.                           | Malvaceae     | x | [75];[103]       |
| <i>Theobroma speciosum</i> Willd. ex Spreng.        | Malvaceae     | x | [104];[105]      |
| <i>Theobroma subincanum</i> Mart.                   | Malvaceae     | x | [75];[106]       |
| <i>Trattinnickia burserifolia</i> Mart.             | Burseraceae   | x | [6];[19]         |
| <i>Vatairea paraensis</i> Ducke                     | Fabaceae      | x | [19]             |
| <i>Vatairea sericea</i> (Ducke) Ducke               | Fabaceae      | x | [18];[93]        |
| <i>Zanthoxylum rhoifolium</i> Lam.                  | Rutaceae      | x | [42];[107];[108] |

Table S2. List of pioneer species with potential use according to the literature review.

| Species                                                 | Family        | References   |
|---------------------------------------------------------|---------------|--------------|
| <i>Abarema jupunba</i> (Willd.) Britton & Killip        | Fabaceae      | [1]          |
| <i>Agonandra brasiliensis</i> Miers ex Benth. & Hook.f. | Opiliaceae    | [109]; [110] |
| <i>Albizia niopoides</i> (Spruce ex Benth.) Burkart     | Fabaceae      | [5]; [111]   |
| <i>Apeiba membranacea</i> Spruce ex Benth.              | Malvaceae     | [112]        |
| <i>Calycophyllum spruceanum</i> (Benth.) K. Schum.      | Rubiaceae     | [113] [114]  |
| <i>Caryocar brasiliense</i> Cambess.                    | Caryocaraceae | [5]          |
| <i>Ceiba pentandra</i> (L.) Gaertn.                     | Malvaceae     | [115]; [116] |
| <i>Colubrina glandulosa</i> Perkins                     | Rhamnaceae    | [66]         |
| <i>Cordia goeldiana</i> Huber                           | Boraginaceae  | [116]        |
| <i>Erythrina verna</i> Vell.                            | Fabaceae      | [117]        |
| <i>Erismia uncinatum</i> Warm.                          | Vochysiaceae  | [113]        |
| <i>Eschweilera coriacea</i> (DC.) S.A. Mori             | Lecythidaceae | [118] [119]  |
| <i>Genipa americana</i> L.                              | Rubiaceae     | [110]; [117] |
| <i>Guazuma ulmifolia</i> Lam.                           | Malvaceae     | [66]         |
| <i>Handroanthus serratifolius</i> (Vahl) S. Grose       | Bignoniaceae  | [117]        |
| <i>Inga alba</i> (Sw.) Willd.                           | Fabaceae      | [120]        |
| <i>Jacaranda copaia</i> (Aubl.) D.Don                   | Bignoniaceae  | [110]; [121] |
| <i>Laetia procera</i> (Poepp.) Eichler                  | Salicaceae    | [122]        |
| <i>Maquira sclerophylla</i> (Ducke) C.C. Berg           | Moraceae      | [110]        |
| <i>Ochroma pyramidale</i> (Cav. ex Lam.) Urb.           | Malvaceae     | [112]; [123] |
| <i>Pterocarpus rohrii</i> Vahl                          | Fabaceae      | [5]          |
| <i>Schizolobium amazonicum</i> Huber ex Ducke           | Fabaceae      | [9]; [110]   |
| <i>Stryphnodendron pulcherrimum</i> (Willd.) Hochr.     | Fabaceae      | [110]        |
| <i>Tapirira guianensis</i> Aubl.                        | Anacardiaceae | [110]; [124] |
| <i>Zanthoxylum rhoifolium</i> Lam.                      | Rutaceae      | [110]; [117] |

**Table S3.** Parameters and statistics of the GLMM equations adjusted for the dependent variables as a function of the independent fixed and random effect variables. The parameters refer to the equations:  $[\log(TP) = a + b(TAF) + c(FR) + d(FR \times TAF) + \varepsilon]$  for the dependent variable density of species with timber potential (TP) ;  $[\log(NTP | MUP) = a + b(FR) + \varepsilon]$  for the dependent variables density of non-timber species (NTP) and density of multiple-use species (MUP). The fixed-effect independent variables are time after first fire event (TAF) and fire recurrence (FR). The independent variable of random effect are composed by the vegetation types (VT), FC = Forested campinarana, TC = Treed campinarana, OFDB = Open forest with dominant bamboo, OFBP = Open forest with bamboo and palms, OFP = Open forest with palms. Values in parentheses indicate 95% confidence intervals.

| <i>Area</i>                         | <i>A</i>     | <i>b</i>      | <i>c</i>      | <i>d</i>     |
|-------------------------------------|--------------|---------------|---------------|--------------|
| <i>Timber potential (TP)</i>        |              |               |               |              |
| Average GLMM                        | 4.51 (±0.34) | -0.31 (±0.25) | -2.37 (±1.55) | 0.46 (±0.38) |
| FC                                  | 4.26         | -0.31         | -1.71         | 0.46         |
| TC                                  | 4.44         | -0.31         | -2.64         | 0.46         |
| OFBP                                | 4.19         | -0.31         | -2.24         | 0.46         |
| OFDB                                | 4.42         | -0.31         | -2.93         | 0.46         |
| OFP                                 | 5.23         | -0.31         | -2.24         | 0.46         |
| <i>Non-timber potential (NTP)</i>   |              |               |               |              |
| Average GLMM                        | 4.23 (±0.30) | -1.28 (±1.32) | -             | -            |
| FC                                  | 4.18         | -2.55         | -             | -            |
| TC                                  | 3.69         | -3.19         | -             | -            |
| OFBP                                | 4.14         | -0.65         | -             | -            |
| OFDB                                | 4.48         | -0.02         | -             | -            |
| OFP                                 | 4.68         | 0.08          | -             | -            |
| <i>Multiple-use potential (MUP)</i> |              |               |               |              |
| Average GLMM                        | 2.63 (±0.29) | -0.49 (±0.15) | -             | -            |
| OFBP                                | 2.90         | -0.49         | -             | -            |
| OFDB                                | 2.38         | -0.49         | -             | -            |
| OFP                                 | 2.63         | -0.49         | -             | -            |



## References

1. Santos, N.M.C. dos; Júnior, J.F. do V.; Barbosa, R.I. Florística e estrutura arbórea de ilhas de mata em áreas de savana do norte da Amazônia brasileira. *Bol. Mus. Para. Emílio Goeldi Ciênc. Nat.* **2013**, 8, 205–221, doi:10.46357/bcnaturais.v8i2.573.
2. Marquete, R. Reserva Ecológica do IBGE - Opiliaceae. *Rodriguésia* **2005**, 56, 133–139, doi:10.1590/2175-78602005568710.
3. Reis, L.P.; Ruschel, A.R.; Coelho, A.A.; Luz, A.S. da; Martins-da-Silva, R.C.V. Avaliação do potencial madeireiro na Floresta Nacional do Tapajós após 28 anos da exploração florestal. *Pesqui. Florest. Bras.* **2010**, 30, 265–281, doi:10.4336/2010.pfb.30.64.265.
4. Carvalho, P.E.R. *Espécies Arbóreas Brasileiras*; EMBRAPA: Brasília, DF, 2014; Vol. 5; ISBN 978-85-7035-338-2.
5. Carvalho, P.E.R. *Espécies Arbóreas Brasileiras*; Brasília, DF, 2008; Vol. 3; ISBN 978-85-7383-429-1.
6. SNIF, S.N. de I.F. Serviço Florestal Brasileiro - Espécies Florestais 2010.
7. Brandes, A.F. das N.; Novello, B.Q.; Domingues, G. de A.F.; Barros, C.F.; Tamaio, N. Endangered Species Account for 10% of Brazil's Documented Timber Trade. *J. Nat. Conserv.* **2020**, 55, 125821, doi:10.1016/j.jnc.2020.125821.
8. Deus, C.E.; Júnior, R.W.; Viana, V.M.; Ferraz, P.A.; Borges, H.B.N.; Almeida, M.C.; Silveira, M.; Vicente, C.A.R.; Andrade, P.H.C. Biblioteca Digital de Produção Intelectual da Universidade de São Paulo. 1993,.
9. Carvalho, P.E.R. *Espécies Arbóreas Brasileiras*; Brasília, DF, 2006; Vol. 2; ISBN 85-7383-373-4.
10. Paula, J.E. de; Alves, J.L.D.H. Anatomia de *Anacardium spruceanum* Bth, Ex Engl. (Anacardiaceae da. Amazônia). **1973**, 15.
11. Amaral, P.; Veríssimo, A.; Barreto, P.; Vidal, E. *Floresta para Sempre: Um Manual para a Produção de Madeira na Amazônia*; 1998; p. 130.
12. Harvey, C.A.; Villanueva, C.; Esquivel, H.; Gómez, R.; Ibrahim, M.; Lopez, M.; Martinez, J.; Muñoz, D.; Restrepo, C.; Saénz, J.C.; et al. Conservation value of dispersed tree cover threatened by pasture management. *For. Ecol. Manag.* **2011**, 261, 1664–1674, doi:10.1016/j.foreco.2010.11.004.
13. Cruz, E.D. morcegueira [*Andira inermis* (W. Wright) DC.]. *Embrapa* **2021**, 9.
14. Shanley, P.; Medina, G. *Frutíferas e Plantas Uteis na Vida Amazonica*; CIFOR, IMAZON: Belém, 2005; ISBN 85-88808-02-1.
15. Sousa, S.H.B. de; Souza, E.K.A. de; Ferreira, M.C.R.; Mattietto, R. de A. Caracterização Físico-Química e Estudo Da Estabilidade da Polpa dos Frutos de Jacaiacá (*Antrocaryon amazonicum* (Ducke) BL Burt AW Hill). Presented at the Congresso Brasileiro de Ciências e Tecnologia de Alimentos, 2018.
16. Ortíz, E.B. "INFLUENCIA DE LAS PROPIEDADES FÍSICAS Y CARACTERÍSTICAS. **1998**, 66.
17. Matos, J.A. Apeiba Membranacea, Spruce Ex Benth "Peine de Mono." *Xilema* **2013**, 26.
18. Araujo, R.H.J.B. de Crescimento de espécies madeireiras comerciais em florestas no Acre. **2018**, 63.
19. Cysneiros, V.C.; Mendonça Júnior, J.O.; Lanza, T.R.; Moraes, J.C.R.; Samor, O.J.M. Espécies madeireiras da Amazônia: riqueza, nomes populares e suas peculiaridades. *Pesqui. Florest. Bras.* **2018**, 38, doi:10.4336/2018.pfb.38e201801567.
20. Carrero, G.C.; Pereira, R. dos S.; Jacaúna, M. do A.; Junior, M. de J.V.L. Árvores do Sul do Amazonas: guia de espécies de interesse econômico e ecológico. *IDESAM* **2014**, 57.
21. Ribeiro, J.E.L. da S.; Hopkins, M.J.G.; Vicenti, A.; Sothers, C.A.; Costa, M.A. da S.; Brito, J.M. de; Souza, M.A.D. de; Martins, L.H.P.; Lohmann, L.G.; Assunção, P.A.C.L. et al. *Guia de Identificação das Plantas Vasculares de uma Floresta de Terra-Firme na Amazônia Central*; INPA - Manaus, 1999; ISBN 85-211-0011-6.
22. Bezerra, S.A.S.; Moreira, R.M.; Campos, de S.; OLIVEIRA, B.R. de; AZEVEDO, A.S.; MONTEIRO, N.C. Cadeia produtiva de duas espécies florestais de uso farmacológico:

- carapanaúba (*Aspidosperma* spp.) E uxi-amarelo (*Endopleurauchi* (Huber) Cuatrec.). *Inst. Nac. Pesqui. Amaz.* **2015**, 10.
23. Sales, M.L.F. Estudo Fitoquímico de *Aspidosperma nitidum* (Benth). Dissertação (Master's thesis in chemistry), Universidade Federal do Amazonas: Manaus - UFAM, 2019.
  24. Araújo, H.J.B. de; Silva, I.G. da Lista de espécies florestais do Acre: Ocorrência com base em inventários florestais. *Embrapa* 2000, 77.
  25. Moussa, F.; Kahn, F. Uso y potencial economico de los palmas, *Astrocaryum aculeatum* Meyer y *A. vulgare* Martius, en la Amazonia brasileña. *Inst. Fr. Rech. Sci. Pour Dév. en Coop. ORSTOM* **1997**.
  26. Balslev, H.; Moraes, M. *Sinopsis de las palmeras de Bolivia*; AAU reports; Aarhus Univ. Press: Risskov, 1989; ISBN 978-87-87600-24-8.
  27. Didonet, A.A. O mercado de um produto florestal não madeireiro e o resíduo sólido gerado pela sua comercialização: O caso do tucumã (*Astrocaryum aculeatum* G. Mey.) nas feiras de Manaus. Dissertação (Master's dissertation in tropical forest sciences, Universidade Federal do Amazonas- UFAM: Manaus, 2012.
  28. Balslev, H.; Grandez, C.; Paniagua Zambrana, N.Y.; Møller, A.L.; Hansen, S.L. Palmas (Arecaceae) útiles en los alrededores de Iquitos, Amazonía Peruana. *Rev. Peru. Biol.* **2008**, 15, 121–132, doi:10.15381/rpb.v15i3.3343.
  29. Bezerra, V.S. Considerações sobre a Palmeira Murumuruzeiro (*Astrocaryum murumuru* Mart.). *Embrapa* **2012**, 6.
  30. Cruz, G. da S.; Gama, J.R.V.; Ribeiro, R.B. da S.; Santos, L.E. dos; Melo, L. de O.; Coelho, A.A. Estrutura e valoração de *Astrocaryum murumuru* Mart. na região do estuário amazônico. *Nativa* **2017**, 5, doi:10.5935/2318-7670.v05nespa18.
  31. Olivares, I.; Galeano, G. leaf and inflorescence production of the wine palm (*Attalea butyracea*) in the dry Magdalena RiVER valley, Colombia. *Caldasia* **2013**, 35, 12.
  32. Bernal, R.; Galeano, G.; García, N.; Olivares, I.L.; Cocomá, C. Uses and commercial prospects for the wine palm, *Attalea butyracea*, in Colombia. *Ethnobot. Res. Appl.* **2010**, 8, 255, doi:10.17348/era.8.0.255-268.
  33. Negrelle, R.R.B. Estrutura populacional e potencial de regeneração de *Attalea phalerata* Mart. ex Spreng. (Acuri). *Ciênc. Florest.* **2013**, 23, 727–734, doi:10.5902/1980509812356.
  34. Ferreira, C.D.; Pena, R.S. Comportamento higroscópico da farinha de pupunha (*Bactris gasipaes*). *Ciênc. E Tecnol. Aliment.* **2003**, 23, 251–255, doi:10.1590/S0101-20612003000200025.
  35. Obermüller, F.A.; Daly, D.C.; Oliveira, E.C.; Souza, H.F.T.P.; Oliveira, H.M. de; Souza, L.S.; Silveira, M. *Guia Ilustrado e Manual de Arquitetura Foliar para Espécies Madeireiras da Amazônia Ocidental*; Rio Branco, AC, 2011; ISBN 978-85-62913-07-5.
  36. Caetano Andrade, V.L.; Flores, B.M.; Levis, C.; Clement, C.R.; Roberts, P.; Schöngart, J. Growth rings of Brazil nut trees (*Bertholletia Excelsa*) as a living record of historical human disturbance in Central Amazonia. *PLOS ONE* **2019**, 14, e0214128, doi:10.1371/journal.pone.0214128.
  37. Souza, C.R. de; Azevedo, C.P. de; Rossi, L.M.B.; Lima, R.M.B. de Growth Rings of Brazil Nut Trees (*Bertholletia excelsa*) as a Living Record of Historical Human Disturbance in Central Amazonia. *Embrapa* 2008.
  38. Furini, T.; Karsburg, I.V.; Fernandes, J.M.; Domingues, S.C. de O.; Barros, J. de O.; Schmitt, J.P.M.; Moreira, E.S.; Scatola, L.F. Morfologia fenotípica de *Bixa arborea* e *Bixa orellana* (Bixaceae) em Alta Floresta, Mato Grosso, Brasil. *Res. Soc. Dev.* **2021**, 10, e54110817706, doi:10.33448/rsd-v10i8.17706.
  39. Soares, W.F.; Melo, L.E. de L.; Lisboa, P.L.B. Anatomia do lenho de cinco espécies comercializadas como sucupira. *Floresta E Ambiente* **2014**, 21, 114–125, doi:10.4322/loram.2013.042.
  40. Almeida, V.B.; Jardim, F.C. da S. Crescimento diamétrico de *Brosimum guianenses* em uma floresta tropical após a colheita de madeira, Moju-PA. *Rev. Ciênc. Agrár.* **2012**, 55, 38–43, doi:10.4322/rca.2012.046.

41. Santos, P.L. dos; Santos, E.A.A. dos; Magalhães, M.R.R.; Santos, V.B. dos; Baraúna, E.E.P. Determinação de extrativos e da densidade básica da madeira de *Brosimum lactescens* (S. Moore) C.C. Berg para fins produtivos. In *Madeiras Nativas e Plantadas do Brasil: Qualidade, pesquisa e atualidades*; Editora Científica digital: Guarujá – SP, 2021; pp. 372–381.
42. Carneiro, M.R.B.; Santos, M.L. dos Importância Relativa de Espécies com Potencial Uso Medicinal na Flora do Centro Oeste do Brasil. *Front. J. Soc. Technol. Environ. Sci.* **2014**, *3*, 145, doi:10.21664/2238-8869.2014v3i2.p145-163.
43. Navarro, E.C. Viabilidade econômica do *Calophyllum brasiliense* (Guanandi). *Rev. Científica Eletrônica Eng. Florest.* **2007**, *36*.
44. Abanto, V.A.A.; Cruz, F.V. de la; Beltran, S.H. Estudio Taxonómico y Morfológico de 20 Especies Forestales en el Bosque CICFOR - Macuya, Pulcallpa - Perú. *Rev. Investig. Univ.* **2018**, *8*.
45. Lorenzi, H. *Árvores Brasileiras: Manual de Identificação e Cultivo de Plantas Arbóreas Nativas do Brasil*; Editora Plantarum: Nova Odessa - SP, 1998;
46. Araújo, B.H.P. de; Sousa, M.A.R. de; Nascimento, H.E.M.; Zanuncio, A.J.V.; Rodrigues, D.M. de S.; Guedes, M.C. Propriedades físicas da madeira de *Calycophyllum spruceanum* Benth. em função do diâmetro e da posição (base e topo) no fuste. *Sci. For.* **2016**, *44*, doi:10.18671/scifor.v44n111.22.
47. Cury, G.; Tomazello, M. Descrição anatômica de espécies de madeira utilizadas na construção civil. *Floresta E Ambiente* **2011**, *18*, 227–236, doi:10.4322/floram.2011.042.
48. Silva, L.F. da; Silva, M.L. da; Cordeiro, S.A. Análise econômica de plantios de jequitibá-branco (*Cariniana estrellensis*). *Rev. Agrogeoambiental* **2012**, *4*, doi:10.18406/2316-1817v4n22012448.
49. Santos, F.S.; Santos, R.F.; Dias, P.P.; únior, L.A.Z.; Tomassoni, F. A Cultura Do Pequi (*Caryocar Brasiliense* Camb.). *Acta Iguazu* **2013**, *2*.
50. Siviero, A.; Lin, C.M.; Silveira, M.; Daly, D.C.; Wallace, R.H., Eds. *Etnobotânica e Botânica Econômica do Acre*; Edufac: Rio Branco, AC, 2016; ISBN 978-85-8236-027-9.
51. Filho, E.M.C.; Sartorelli, P.A.R. *Guia de Árvores com Valor Econômico*; São Paulo, 2015; ISBN 978-85-5655-000-2.
52. Daly, D.C.; Silveira, M. *Primeiro Catálogo da Flora do Acre, Brasil / First Catalogue of Flora of Acre, Brazil*; EDUFAC: Rio Branco, AC, 2008; ISBN 978-85-98499-44-4.
53. Demarchi, L.O.; Scudeller, V.V.; Moura, L.C.; Lopes, A.; Piedade, M.T.F. Logging Impact on Amazonian white-sand Forests: Perspectives from a sustainable development reserve. *Acta Amaz.* **2019**, *49*, 316–323, doi:10.1590/1809-4392201802332.
54. Carvalho, P. E. R *Espécies Arbóreas Brasileiras*; EMBRAPA: Brasília, DF, 2003; Vol. 1;.
55. Sieglow, A.M.; Santos, S.R.D.; Marchiori, J.N.C. Estudo anatômico do lenho de colubrina *Glandulosa perkinsl. Balbuina* **2011**, *7*.
56. Nahuz, A.R. *Catálogo de Madeiras Brasileiras Para a Construção Civil*; São Paulo, 2013;
57. dos Santos, R.F.E.P.; Silva Silva, I.S. de M.; d'Costa, L.R.; Barbosa, A.M.; Silva, K.S.; Amorim, M.R.; Diz, F.M.; Lins, T.H.; Sales Verissimo, R.C.S.; Padilha, F.F.; et al. Study of antimicrobial potential and cytotoxic of *Cordia nodosa* species. *BMC Proc.* **2014**, *8*, P69, 1753-6561-8-S4-P69, doi:10.1186/1753-6561-8-S4-P69.
58. Procópio, L.C.; Gayot, M.; Sist, P.; Ferraz, I.D.K. As espécies de tauari (Lecythidaceae) em florestas de terra firme da Amazônia: Padrões de distribuição geográfica, abundâncias e implicações para a conservação. *Acta Bot. Bras.* **2010**, *24*, 883–897, doi:10.1590/S0102-33062010000400002.
59. Cruz, H.; Sablayrolles, P.; Kanashiro, M.; Amaral, M.; Sist, P. *Relação Empresa|Comunidade no Contexto do Manejo Fl Orestal Comunitário e Familiar: Uma Contribuição do Projeto Floresta em Pé*; Belém, Pará, 2011; ISBN 978-85-7300-360-4.
60. Kumar, C.S.; Nares, G.; Sudheer, V.; Veldi, N.; Elumalai, A. A short review on therapeutic uses of *Couroupita guianensis*. *Int. Res. J. Pharm. Appl. Sci.* **2011**, *5*.
61. Magalhães, C.F.C.B.; Gomes, J.G.F.; Andrade, W.T.B. de; Nascimento, Y.G. do; Leite, N.F. de B. Avaliação in silico do potencial antiinflamatório de alcaloides indólicos presentes nas

- sementes de *Couroupita guianensis*. *Res. Soc. Dev.* **2021**, *10*, e27810212514, doi:10.33448/rsd-v10i2.12514.
62. Franco, E.T.H.; Ferreira, A.G. Tratamentos pré-germinativos em sementes de *Didymopanax morototoni* (Aubl.) Dcne. et Planch. *Ciênc. Florest.* **2002**, *12*, 1–10, doi:10.5902/198050981695.
  63. Barroso, J.G.; Salimon, C.I.; Silveira, M. Influência de fatores ambientais sobre a ocorrência e distribuição espacial de cinco espécies madeireiras exploradas no Estado do Acre, Brasil. *Sci For* **2011**, *39*, 11.
  64. Lima, A.P.; Lima, O.P. de; Magnusson, W.E.; Higuchi, N.; Reis, F.Q. Regeneration of five commercially-valuable tree species after experimental logging in an Amazonian forest. *Rev. Árvore* **2002**, *26*, 567–571, doi:10.1590/S0100-67622002000500006.
  65. Raimundo, K.F.; Bortolucci, W. de C.; Glamočlija, J.; Soković, M.; Gonçalves, J.E.; Linde, G.A.; Colauto, N.B.; Gazim, Z.C. Antifungal activity of *Gallesia integrifolia* fruit essential oil. *Braz. J. Microbiol.* **2018**, *49*, 229–235, doi:10.1016/j.bjm.2018.03.006.
  66. Barbosa, L.M.; Shirasuna, R.T.; Lima, F.C. de; Ortiz, P.R.T. Lista de espécies indicadoras para restauração ecológica para diversas regiões do Estado de São Paulo 2017.
  67. Pereira, G.A.; Peixoto Araujo, N.M.; Arruda, H.S.; Farias, D. de P.; Molina, G.; Pastore, G.M. Phytochemicals and Biological activities of mutamba (*Guazuma ulmifolia* Lam.): A review. *Food Res. Int.* **2019**, *126*, 108713, doi:10.1016/j.foodres.2019.108713.
  68. Kumar, N.S.; Gurunani, S.G. Guazuma Ulmifolia LAM: A Review for Future View. *J. Med. Plants Stud.* **2019**, *6*.
  69. Zacharias, S.R. Plantas lenhosas conhecidas para tecnologia em um assentamento rural no cerrado. *Rev. Etnobiologia* **2020**, *21*.
  70. Machado, F.S. *Manejo de Produtos Florestais Não Madeireiros: Um Manual com Sugestões para o Manejo Participativo em Comunidades da Amazônia*; CIFOR, 2008; ISBN 978-85-908217-0-0.
  71. Segovia, I.F.O. Sucuúba, usos medicinais, ocorrência e conservação a campo no Amapá. **2003**, *70*, 4.
  72. Sequeira, B.J.; Vital, M.J.S.; Pohlit, A.M.; Pararols, I.C.; Caúper, G.S.B. Antibacterial and antifungal activity of extracts and exudates of the Amazonian medicinal tree *Himatanthus Articulatus* (Vahl) Woodson (Common Name: Sucuba). *Mem. Inst. Oswaldo Cruz* **2009**, *104*, 659–661, doi:10.1590/S0074-02762009000400022.
  73. Owojuyigbe, O.S.; Firempong, C.K.; Larbie, C.; Komlaga, G.; Emikpe, B.O. Hepatoprotective Potential of *Hura crepitans* L.: A review of ethnomedical, phytochemical and pharmacological studies. *J. Complement. Altern. Med. Res.* **2020**.
  74. Cavalcante, P.B. *Frutas Comestíveis da Amazônia*; 1979;
  75. Salomão, R.D.P.; Vieira, I.C.G.; Suemitsu, C.; Rosa, N.D.A.; Almeida, S.S. de; Amaral, D.D. do; Menezes, M.P.M. de As florestas de Belo Monte na grande curva do rio Xingu, Amazônia Oriental. *Bol. Mus. Para. Emílio Goeldi - Ciênc. Nat.* **2007**, *2*, 57–153, doi:10.46357/bcnaturais.v2i3.696.
  76. Silva, F.B. da; Gomes, J.I.; Costa, C.C. da; Martins-da-Silva, R.C.V.; Carvalho, L.T. de; Margalho, L.F. Conhecendo Espécies de Plantas da Amazônia: Ingá-Costela (*Inga capitata* Desv.– Leguminosae). *Embrapa* **2014**, *4*.
  77. Rios, S.; Jr, F.P. *Plantas da Amazônia : 450 Espécies de Uso Geral*; Brasília, DF, 2011; ISBN 978-85-64593-02-2.
  78. Nascimento, C.C. do; Garcia, J.N.; Díaz, M. del P. Agrupamento de espécies madeireiras da Amazônia em função da densidade básica e propriedades mecânicas. *Madera Bosques* **2016**, *3*, 33–52, doi:10.21829/myb.1997.311378.
  79. Paumgartten, A. É. A; Brasil Neto, A.B.; Sousa, V.G. de; Brienza Júnior, S.; Yared, J.A.G. Desempenho silvicultural *Jacaranda copaia* (Aubl.) D. Don sob diferentes espaçamentos no oeste do Pará. *Sci. For.* **2018**, 701–707.
  80. Alegría, J.J.; Hoyos, O.L.; Prado, J.A. Características físico-químicas de dos variedades del fruto del zapote (*Matisia cordata*) comercializadas en el departamento del Cauca. *Fac. Cienc. Agropecu.* **2007**, *5*, 7.

81. Gilmore, M.P.; Endress, B.A.; Horn, C.M. The socio-cultural importance of *Mauritia flexuosa* palm swamps (aguajales) and implications for multi-use management in two Maijuna communities of the Peruvian Amazon. *J. Ethnobiol. Ethnomedicine* **2013**, *9*, 29, doi:10.1186/1746-4269-9-29.
82. Rull, V.; Montoya, E. *Mauritia flexuosa* palm swamp communities: natural or human-made? A palynological study of the Gran Sabana region (northern South America) within a Neotropical context. *Quat. Sci. Rev.* **2014**, *99*, 17–33, doi:10.1016/j.quascirev.2014.06.007.
83. Vieira, D. dos S.; Gomes, K.M.A.; Santos, L.E. dos; Oliveira, M.L.R. de; Gama, J.R.V.; Mendonça, E.L.M.; Lafetá, B.O.; Moura, C.C. de; Figueiredo, A.E.S. Estrutura diamétrica e espacial de espécies madeiras de importância econômica na Amazônia. *Sci. For.* **2021**, *49*, doi:10.18671/scifor.v49n129.21.
84. Carvalho, P.E.R. *Espécies Arbóreas Brasileiras*; Brasília, DF EMBRAPA, 2010; Vol. 4; ISBN 978-85-7383-487-1.
85. Silva, W.D.S. da; Reis, P.C.M. dos R.; Reis, L.P.; Santos, A. dos S.; Costa, M.G. Propriedades físico-mecânica de madeiras amazônicas estimadas por redes neurais artificiais, a partir da densidade básica. In *Madeiras Nativas e Plantadas do Brasil: Qualidade, Pesquisa e Atualidades*; Científica, 2021; Vol. 1 ISBN 978-65-89826-38-5.
86. Mendonça, M.S. de; Oliveira, A.B. de; Araújo, M.G.P. de; Araújo, L.M. Morfo-anatomia do fruto e semente de *Oenocarpus minor* Mart. (Arecaceae). *Rev. Bras. Sementes* **2008**, *30*, 90–95, doi:10.1590/S0101-31222008000100012.
87. Mesa, L.; Galeano, G. Usos de las palmas en la Amazonia Colombiana. *Caldasia* **2013**, *19*.
88. Pinheiro, R. de M.; Soares, V.N.; Gadotti, G.I.; Silva, E.J.S. da; Almeida, A. da S. Germinative performance of mulungú seeds (*Ormosia grossa* rudd) after dormancy overcoming. *Rev. Árvore* **2021**, *45*, e4532, doi:10.1590/1806-908820210000032.
89. Ferraz, I.D.K.; Leal Filho, N.; Imakawa, A.M.; Varela, V.P.; Piña-Rodrigues, Fátima.C.M. Características básicas para um agrupamento ecológico preliminar de espécies madeiras da floresta de terra firme da Amazônia Central. *Acta Amaz.* **2004**, *34*, 621–633, doi:10.1590/S0044-59672004000400014.
90. Borges, E.S.; Rezende, C.M. Main aroma constituents of genipap (*Genipa americana* L.) and bacuri (*Platonia insignis* M.). *J. Essent. Oil Res.* **2000**, *12*, 71–74, doi:10.1080/10412905.2000.9712046.
91. SOUZA, L.A.G. de; SILVA, M.F. da; DANTAS, A.R. Germinação de sementes e inoculação de mudas de macacaúba (*Platymiscium trinitatis* Benth. - Leguminosae Papilionoideae) com rizóbios em latossolo amarelo. *Acta Amaz.* **2001**.
92. Ferreira, L.D.C.O.; Neto, A.P. da C.; Fernandes, G.G. de C.; Albuquerque, Á.R.; Vieira, A.L.M. Banco de dados de produtos não madeiros da Floresta Nacional do Tapirapé-Aquiri, Serra de Carajás. *Biodiversidade Bras. - BioBrasil* **2022**, *12*, 79–87, doi:10.37002/biobrasil.v12i1.1841.
93. Araujo, H.J.B. de Acervo Arbóreo Madeiro das Áreas sob Manejo Florestal Comunitário do Projeto de Colonização Pedro Peixoto. *Embrapa* **2015**, 49.
94. Teles, R.F. Propriedades Tecnológicas de Vigas de Madeira Laminada Colada Produzidas com Louro Vermelho (*Sextonia rubra*). Dissertação (mestrado em Ciências Florestais), Universidade de Brasília: Brasília, DF, 2009.
95. Ayoka, A.O.; Akomolafe, R.O.; Akinsomisoye, O.S.; Ukponmwan, O.E. Medicinal and economic value of *Spondias mombin*. *Afr. J. Biomed. Res.* **2010**, *11*, doi:10.4314/ajbr.v11i2.50714.
96. Tiburski, J.H.; Rosenthal, A.; Deliza, R.; de Oliveira Godoy, R.L.; Pacheco, S. Nutritional properties of yellow mombin (*Spondias mombin* L.) Pulp. *Food Res. Int.* **2011**, *44*, 2326–2331, doi:10.1016/j.foodres.2011.03.037.
97. Pereira, A.G.; Cruz, E.D.; Barros, H.S.D. Methods for overcoming dormancy in *Stryphnodendron pulcherrimum* Seeds. *Pesqui. Florest. Bras.* **2016**, *36*, 195, doi:10.4336/2016.pfb.36.87.931.
98. Santos, I.N.L. dos; Lopes, M.T.G.; Valente, M.S.F.; Lima Júnior, M. de J.V.; Fraxe, T. de J.P. Avaliação genética em sementes de *Stryphnodendron pulcherrimum* sob diferentes níveis de temperatura. *Sci. For.* **2020**, *48*, doi:10.18671/scifor.v48n125.06.

99. Grogan, J.; Barreto, P.; Veríssimo, A. *Mogno na Amazônia Brasileira: Ecologia e Perspectivas de Manejo*; IMAZON: Brasília, DF. 2002; ISBN 85-86212-04-0.
100. Bentes-Gama, M. de M.; Scolforo, J.R.S.; Gama, J.R.V. Potencial produtivo de madeira e palmito de uma floresta secundária de várzea baixa no Estuário amazônico. *Rev. Árvore* **2002**, *26*, 311–319, doi:10.1590/S0100-67622002000300006.
101. Santana, W.M.S.; Silva-Mann, R.; Ferreira, R.A.; Arrigoni-Blank, M. de F.; Blank, A.F. Morfologia de flores, frutos e sementes de pau-pombo (*Tapirira guianensis* Aublet. - Anacardiaceae) na região de São Cristóvão, SE, Brasil. *Sci. For.* **2009**, *37*, 8.
102. Braga, P.I.S.; Silva, S.M.G. da; Braga, J.O.N.; Nascimento, K.G.S.; Rabelo, S.L. *Vegetação das Comunidades da Área de Influência do Projeto Piatam e do Gasoduto Coari-Manaus*; Reggo Edições: Manaus, 2011; Vol. 2.
103. Vega, C.; Kwik-Urbe, C. *Theobroma cacao* - An introduction to the plant, its composition, uses, and health benefits. In *Cocoa Butter and Related Compounds*; Elsevier, 2012; pp. 35–62 ISBN 978-0-9830791-2-5.
104. Neto, G.G.; Silva, F.H.B. da. Plantas da Amazônia Mato-Grossense: O Cacaúí –. *FLOVET - Bol. Grupo Pesqui. Flora Veg. E Etnobotânica* **2011**, *8*.
105. Barbosa, L.; França, I.; Ruz, E.H. Primer Registro de La Dispersión de Frutos de *Theobroma speciosum*. *Rev. Acad. Colomb. Cienc. Exactas Físicas Nat.* **2019**, *43*, 518–520, doi:10.18257/raccefyn.891.
106. Arenas-De-Souza, M.D.; Rossi, A.A.B.; Varella, T.L.; Silveira, G.F.D.; Souza, S.A.M. Stigmatic receptivity and pollen viability of *Theobroma subincanum* mart.: Fruit species from the Amazon region. *Rev. Bras. Frutic.* **2016**, *38*, doi:10.1590/0100-29452016757.
107. Jullian, V.; Bourdy, G.; Georges, S.; Maurel, S.; Sauvain, M. Validation of use of a traditional antimalarial remedy from French Guiana, *Zanthoxylum rhoifolium* Lam. *J. Ethnopharmacol.* **2006**, *106*, 348–352, doi:10.1016/j.jep.2006.01.011.
108. Silva, S.L. da; Figueiredo, P.M.; Yano, T. Cytotoxic evaluation of essential oil from *Zanthoxylum rhoifolium* Lam. Leaves. *Acta Amaz.* **2007**, *37*, 281–286, doi:10.1590/S0044-59672007000200015.
109. Pinheiro, K.A.O.; Carvalho, J.O.P. de; Quanz, B.; Francez, L.M. de B.; Schwartz, G. fitossociologia de uma área de preservação permanente no Leste da Amazônia: Indicação de espécies para recuperação de áreas alteradas. *Floresta* **2007**, *37*, doi:10.5380/rf.v37i2.8648.
110. Amaral, D.D. do; Vieira, I.C.G.; Almeida, S.S. de; Salomão, R. de P.; Silva, A.S.L. da; Jardim, M.A.G. Checklist da Flora Arbórea de Remanescentes Florestais da Região Metropolitana de Belém e Valor Histórico dos Fragmentos, Pará, Brasil. *Boletim do Museu Paraense Emílio Goeldi. Ciências Naturais* **2009**, *4*, doi:10.46357/bcnaturais.v4i3.651.
111. Barbeiro, C.; Firmino, T.P.; Novais, A.H.O. de; Romagnolo, M.B.; Pastorini, L.H. Germination and growth of *Albizia Niopoides* (Benth) Burkart (Fabaceae). *Acta Sci. Biol. Sci.* **2018**, *40*, 39073, doi:10.4025/actascibiols.v40i1.39073.
112. Zalamea, P.-C.; Sarmiento, C.; Arnold, A.E.; Davis, A.S.; Dalling, J.W. Do soil microbes and abrasion by soil particles influence persistence and loss of physical dormancy in seeds of tropical pioneers? *Front. Plant Sci.* **2015**, *5*, doi:10.3389/fpls.2014.00799.
113. Almeida, M.D.C. Aspectos ecofisiológicos da germinação de sementes de mulateiro (*Calycophyllum spruceanum* Benth.) - Rubiaceae. **2003**, 116.
114. Cornelius, J.P.; Pinedo-Ramírez, R.; Sotelo Montes, C.; Ugarte-Guerra, L.J.; Weber, J.C. Efficiency of early selection in *Calycophyllum spruceanum* and *Guazuma crinita*, two fast-growing timber species of the Peruvian Amazon. *Can. J. For. Res.* **2018**, *48*, 517–523, doi:10.1139/cjfr-2017-0407.
115. Zotz, G.; Winter, K. Photosynthesis of a tropical canopy tree, *Ceiba pentandra*, in a lowland forest in Panama. *Tree Physiol.* **1994**, *14*, 1291–1301, doi:10.1093/treephys/14.11.1291.
116. d'Oliveira, M.V. *Sustainable Forest Management for Small Farmers in Acre State in the Brazilian Amazon*; 2000;
117. Motta, M.L.E.; Benvenutti, R.D.; Antunes, E.C. Aplicação dos estudos fitossociológicos ao reflorestamento ciliar do Vale do Rio Turvo, GO. **1997**.

118. LIRA, L.P. Agrupamento ecológico e funcional de espécies florestais da Amazônia Central. Dissertação (Master's dissertation in forest and environmental sciences), Universidade Federal do Amazonas - UFAM: Manaus, 2011.
119. Paixão, K.R.C.; Silveira, A.L.P. da O componente arbóreo de 1,0 ha de floresta de várzea no Sudoeste da Amazônia, Rondônia, Brasil. *Rev. Bras. Ciênc. Amaz.* **2020**, *9*, 78–89, doi:10.47209/2317-5729.v.9.n.3.p.78-89.
120. Parron, L.M.; Ribeiro, J.F. Revegetação de uma área degradada no Corrego Sarandi, Planaltina. In *Boletim do Herbário Ezechias Paulo Heringer*; 2000; Vol. 5, pp. 1–127 ISBN 0104-5334.
121. Gurgel, E.S.C. *Jacaranda copaia* (Aubl.) D. Don. subsp. *spectabilis* (Mart. ex A. DC) Gentry (Bignoniaceae): Aspectos morfológicos do fruto, semente, germinação e plântula. **2006**, *1*, 8.
122. Silva, C.E.M.; Gonçalves, J.F. de C.; Feldpausch, T.R.; Luizão, F.J.; Morais, R.R.; Ribeiro, G.O. Eficiência no uso dos nutrientes por espécies pioneiras crescidas em pastagens degradadas na Amazônia central. *Acta Amaz.* **2006**, *36*, 503–512, doi:10.1590/S0044-59672006000400011.
123. Marengo, R.A.; Gonçalves, J.F. de C.; Vieira, G. Photosynthesis and leaf nutrient contents in *Ochroma pyramidale* (Bombacaceae). *Photosynthetica* **2001**, *39*, 539–543, doi:10.1023/A:1015699927924.
124. Fernandes, M.M.; Venturieri, G.C.; Jardim, M.A.G. Biologia, visitantes florais e potencial melífero de *Tapirira guianensis* (Anacardiaceae) na Amazônia Oriental. *Rev. Ciênc. Agrár.* **2012**, *55*, 167–175, doi:10.4322/rca.2012.058.
